# Supplementary material for: Design and tuning of ionic liquid–based HNO donor through intramolecular hydrogen bond for efficient inhibition of tumor growth
Source: PubMed Central journal article supplement — Sci Adv. 2020 Nov 6;6(45):eabb7788. doi: 10.1126/sciadv.abb7788 (PMC7673712; doi:10.1126/sciadv.abb7788), 2020-11-06
Supplement: abb7788_SM.pdf [file abb7788_SM.pdf]

## Supplementary Materials for

### **Design and tuning of ionic liquid–based HNO donor through intramolecular hydrogen bond for efficient inhibition of tumor growth**

Xiaoyu Lv, Kaihong Chen, Guiling Shi, Wenjun Lin, Hongzhen Bai\*, Haoran Li, Guping Tang, Congmin Wang\*

\*Corresponding author. Email: hongzhen\_bai@zju.edu.cn (H.B.); chewcm@zju.edu.cn (C.W.)

Published 6 November 2020, *Sci. Adv.* **6**, eabb7788 (2020)

DOI: 10.1126/sciadv.abb7788

#### **This PDF file includes:**

NMR characterization

Figs. S1 to S6

Tables S1 to S3

References

### NMR characterization

**[Ch][Tau]:**  $^1\text{H}$  NMR (400 MHz, DMSO): 3.83 (ddd, 2H), 3.44 – 3.38 (m, 2H), 3.12 (s, 9H), 2.77 (t, 2H), 2.51 (dd, 2H).  $^{13}\text{C}$  NMR (101 MHz, DMSO): 67.09 – 66.76, 55.15, 54.56, 53.32 – 52.95, 38.40 ppm.

**[EMIm][APA]:**  $^1\text{H}$  NMR (400 MHz, DMSO): 9.83 (s, 1H), 7.84 (t, 1H), 7.75 (t, 1H), 4.21 (q, 2H), 3.87 (s, 3H), 2.56 (t, 2H), 1.90 (dd, 2H), 1.40 (t, 3H).  $^{13}\text{C}$  NMR (101 MHz, DMSO): 174.55, 137.18, 123.46, 121.88, 43.93, 42.14, 35.50, 15.16 ppm.

**[Ch][APA]:**  $^1\text{H}$  NMR (400 MHz, DMSO): 3.81 (d, 2H), 3.49 – 3.36 (m, 2H), 3.13 (s, 9H), 2.58 (t, 2H), 1.97 (t, 2H).  $^{13}\text{C}$  NMR (101 MHz, DMSO): 175.99, 72.35, 67.31, 64.51, 64.28, 59.89, 55.05, 53.42 – 52.93, 41.74, 40.04, 39.81, 39.49, 39.14, 39.00 ppm.

**[APMim][BF<sub>4</sub>]:**  $^1\text{H}$  NMR (400 MHz, DMSO): 8.94 (d, 1H), 7.66 (t, 1H), 7.60 (t, 1H), 4.27 – 4.15 (m, 2H), 3.83 (s, 3H), 3.38 (s, 2H), 2.59 – 2.51 (m, 2H), 1.94 – 1.81 (m, 2H).  $^{13}\text{C}$  NMR (101 MHz, DMSO): 136.77, 123.75, 122.45, 46.77, 37.75, 35.86, 32.30.

**[EMIm][Tau]:**  $^1\text{H}$  NMR (400 MHz, DMSO): 9.20 (s, 1H), 7.81 (d, 1H), 7.72 (d, 1H), 4.20 (q, 2H), 3.86 (s, 3H), 2.76 (t, 2H), 2.50 (t, 2H), 1.41 (t, 3H).  $^{13}\text{C}$  NMR (101 MHz, DMSO): 136.32, 123.54, 121.95, 54.92, 44.06, 38.52, 35.63, 15.10 ppm.

**[HEMN][Tau]:**  $^1\text{H}$  NMR (400 MHz, DMSO): 3.84 (t, 4H), 3.54 – 3.45 (m, 4H), 3.13 (s, 6H), 2.76 (t, 2H), 2.51 (t, 2H).  $^{13}\text{C}$  NMR (101 MHz, DMSO): 65.74, 54.93, 54.73, 51.56, 51.52, 51.48, 38.40 ppm.

**[P<sub>66614</sub>][Tau]:**  $^1\text{H}$  NMR (400 MHz, DMSO): 2.75 (t, 2H), 2.48 (t, 2H), 2.19 (m, 12H), 1.70 – 1.08 (m, 48H), 1.02 – 0.62 (m, 8H).  $^{13}\text{C}$  NMR (101 MHz, DMSO): 54.93, 38.58,

31.28, 30.82, 30.39, 30.21, 30.02, 29.81, 29.66, 29.03, 29.00, 28.95, 28.70, 28.63, 28.08, 22.07, 21.90, 21.79, 21.19, 20.54, 20.49, 17.68, 17.58, 17.21, 17.11, 13.89, 13.81 ppm.

**[EMIm][AMS]:**  $^1\text{H}$  NMR (400 MHz, DMSO): 9.20 (s, 1H), 7.79 (t, 1H), 7.71 (t, 1H), 4.19 (q, 2H), 3.85 (s, 3H), 3.12 (s, 1H), 2.54 (t, 1H), 2.45 – 2.39 (m, 1H), 1.61 (ddt, 1H), 1.41 (t, 3H).  $^{13}\text{C}$  NMR (101 MHz, DMSO): 136.41, 123.59, 121.99, 60.54, 49.39, 44.12, 41.11, 40.15, 39.94, 39.73, 39.52, 39.31, 39.10, 38.89, 35.69, 29.40, 15.16 ppm.

**[EMIm][APS]:**  $^1\text{H}$  NMR (400 MHz, DMSO): 9.22 (s, 1H), 7.81 (t, 1H), 7.72 (t, 1H), 4.20 (q, 2H), 3.86 (s, 3H), 2.57 – 2.48 (m, 2H), 2.41 (dt, 2H), 1.69 – 1.55 (m, 2H), 1.41 (t, 3H).  $^{13}\text{C}$  NMR (101 MHz, DMSO): 136.36, 123.54, 121.94, 49.36, 44.05, 41.13, 35.63, 29.53, 15.10 ppm.

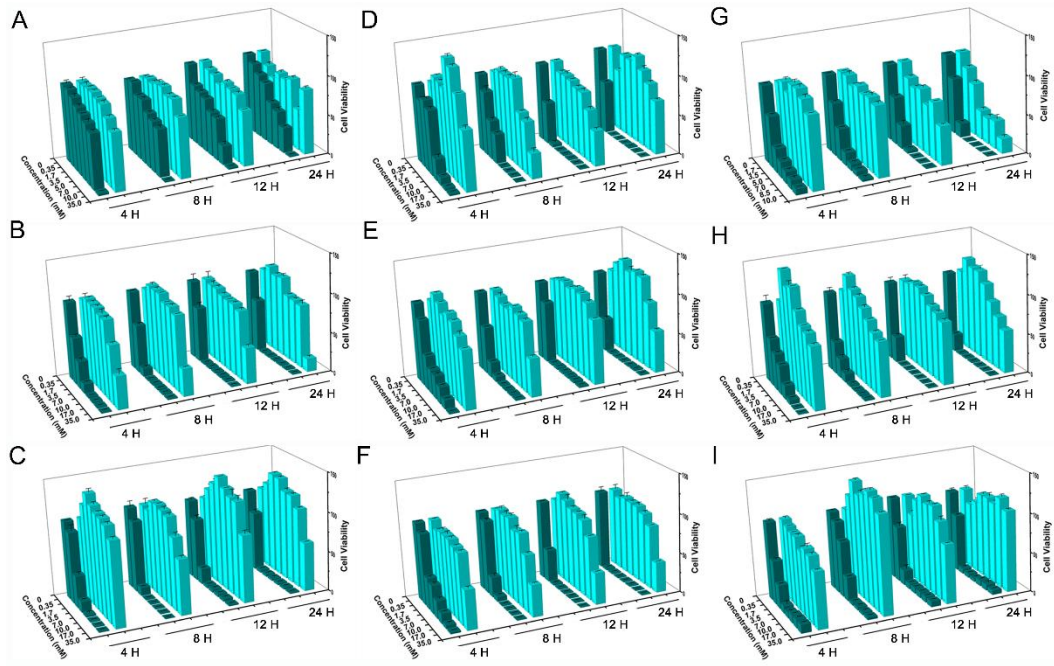

**Fig. S1. *In vitro* cytotoxicity of ILs and IL-NONOates.** ILs (Dark cyan) and IL-NONOates (cyan). (A, D and G) [Ch][Tau] and [Ch][Tau]-NONOate. (B, E and H) [EMIm][APA] and [EMIm][APA]-NONOate. (C, F and I) [Ch][APA] and [Ch][APA]-NONOate. (A - C) CT-26. (D - F) MCF-7 and (G - I) HEK-293 cells. The cytotoxicity was evaluated after 4, 8, 12 or 24 hour of incubation with the sample by MTT assay (n = 5).

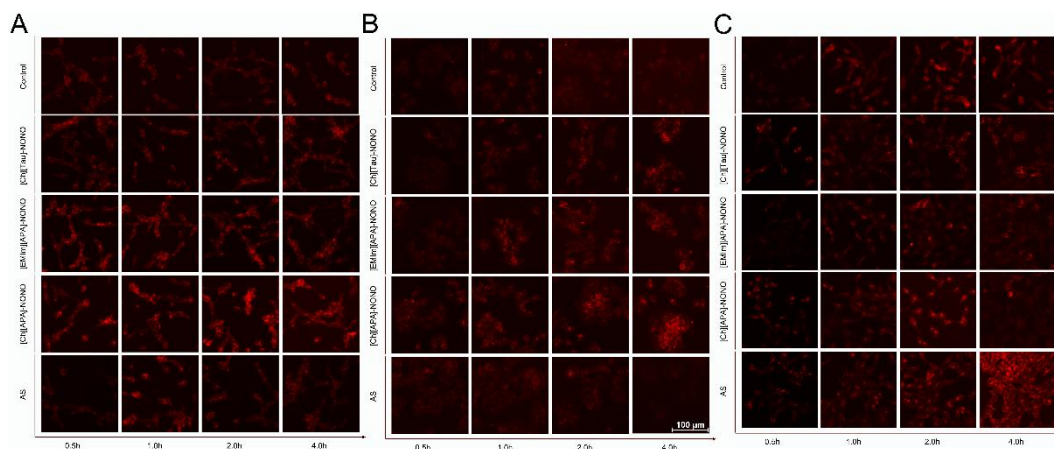

**Fig. S2. Temporal changes in RNS production in cells treated with IL-NONOates or Angeli's salt.** Angeli's salt (AS). (A) CT-26 (B) MCF-7 and (C) HEK-293 cells.

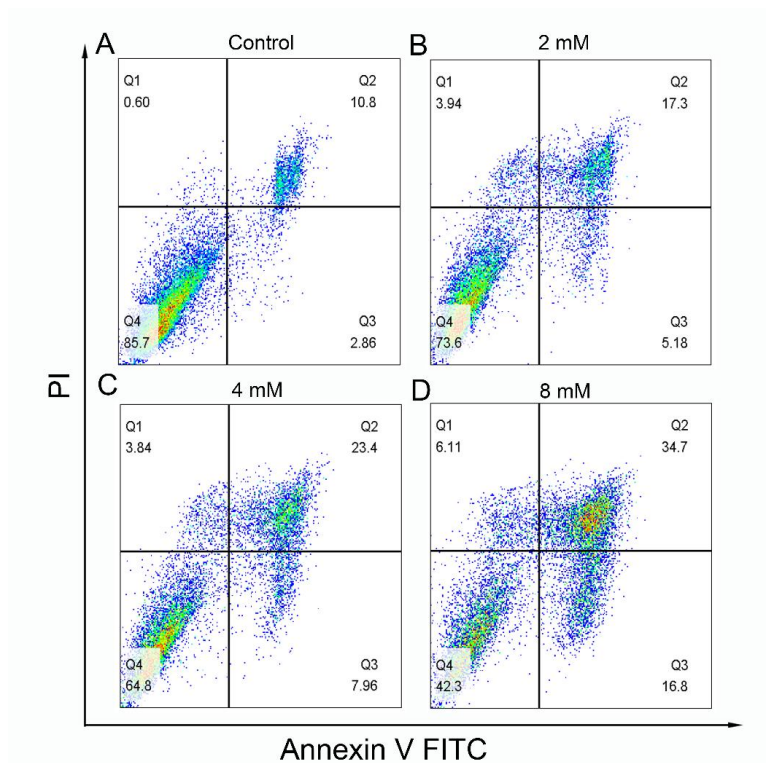

**Fig. S3. Representative flow-cytometric analysis of cell apoptosis.** Flow-cytometric analysis of Annexin-V/PI staining of CT-26 cells after different concentrations of [Ch][Tau]-NONOate.

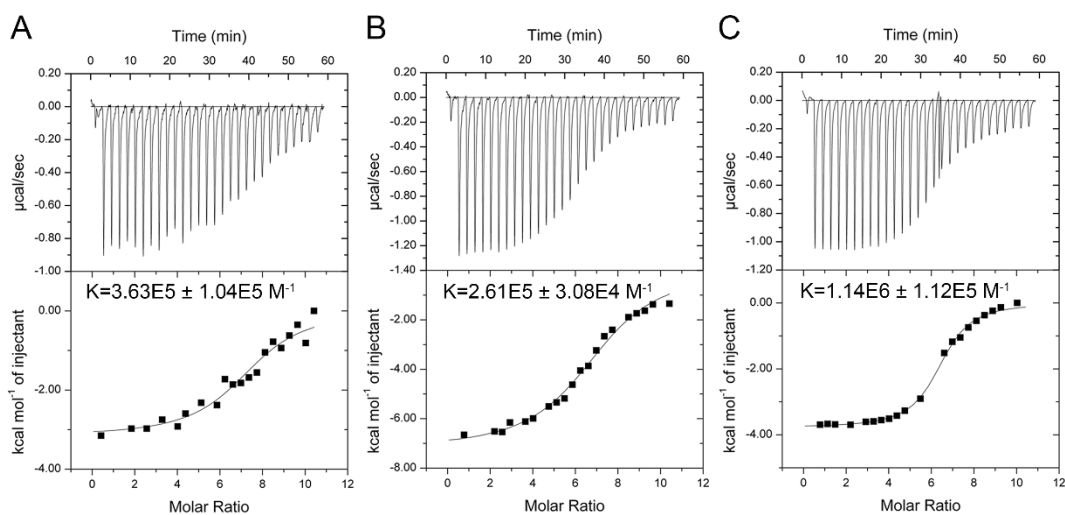

**Fig. S4. ITC curves obtained by titrating ILs into cardiolipin. (A) [Ch][Tau], (B) [EMIm][APA] and (C) [Ch][APA].**

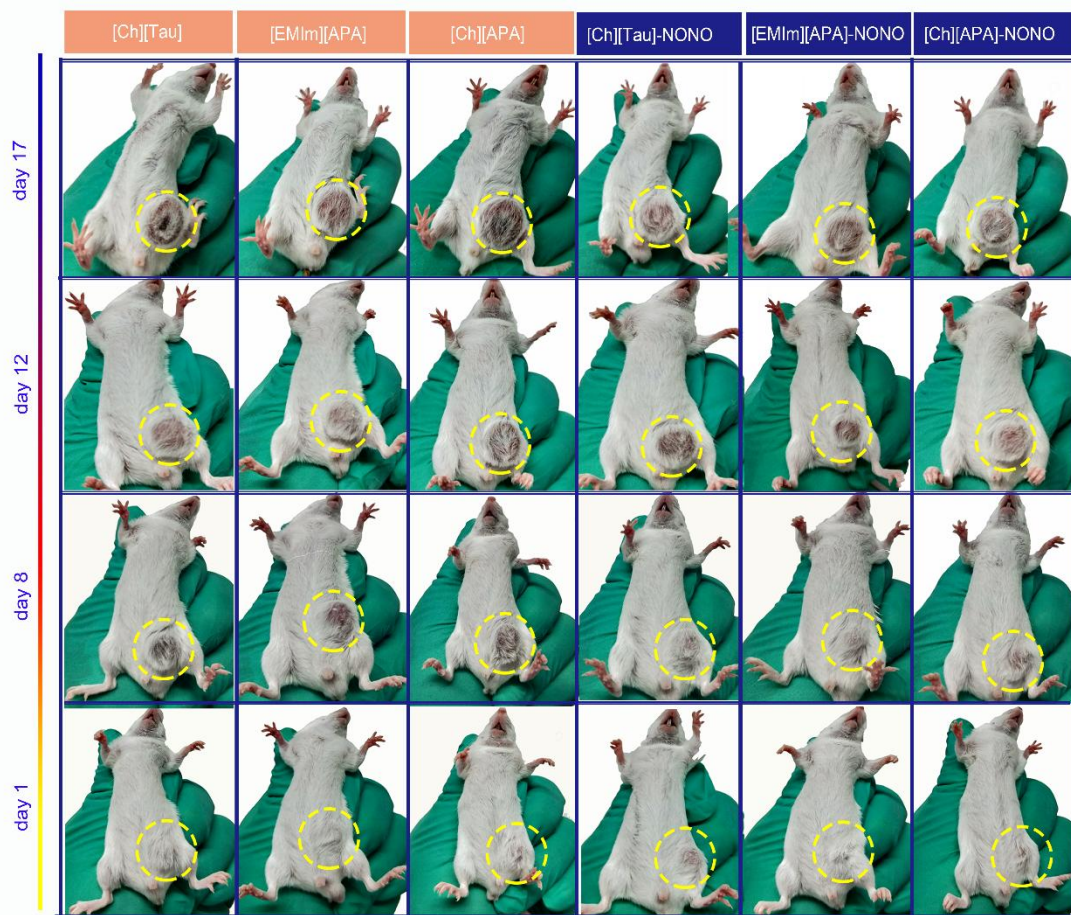

**Fig. S5. Representative images of *in vivo* tumor growth.** The yellow dash line denotes the tumor position. Photo Credit: Xiaoyu Lv, Zhejiang University.

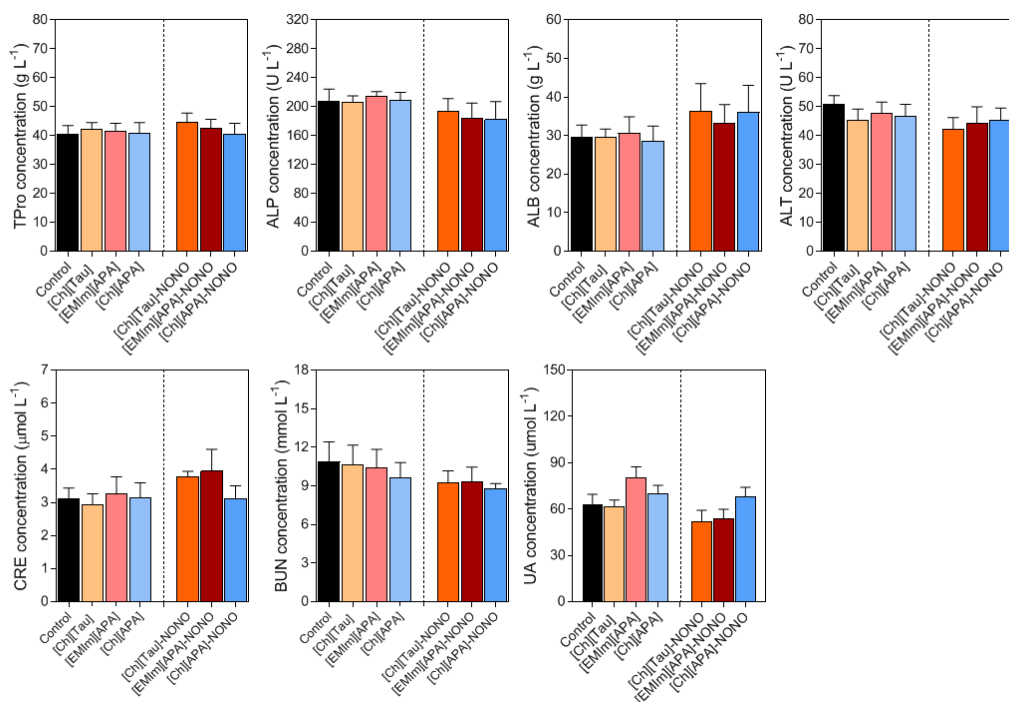

**Fig. S6. The biosafety evaluation of ILs and IL-NONOates.** Blood biochemical analyses including liver functions and kidney functions. TPro: total protein, ALP: alkaline phosphatase, ALB: albumin, ALT: alanine aminotransferase, CRE: creatinine, BUN: blood urea nitrogen, and UA: uric acid ( $n = 4$ ). The data were expressed as mean  $\pm$  s.d.

**Table S1. HNO release half-lives of IL-NONOates under phosphate buffer (PBS), fetal bovine serum (FBS) and mouse serum (Serum) conditions (37 °C, pH = 7.4).**

|               | [Ch][Tau]-NONO  | [EMIm][APA]-NONO | [Ch][APA]-NONO |
|---------------|-----------------|------------------|----------------|
| PBS Solutions | $t_{1/2}$ (min) |                  |                |
| PBS           | 289             | 996              | 1061           |
| 10% FBS       | 239             | 868              | 892            |
| 10% Serum     | 187             | 765              | 990            |
| 20% Serum     | 117             | 510              | 990            |

**Table S2. The thermodynamic parameters of ITC curves. [Ch][Tau], [Ch][APA] or [EMIm][APA] was titrated into cardiolipin at 25 °C.**

| Sample      | $K_a$ ( $\times 10^5 M^{-1}$ ) | $\Delta H$ (kcal mol <sup>-1</sup> ) | $T\Delta S$ (kcal mol <sup>-1</sup> ) |
|-------------|--------------------------------|--------------------------------------|---------------------------------------|
| [Ch][Tau]   | $3.63 \pm 1.04$                | $-3.16 \pm 0.13$                     | 0.37                                  |
| [EMIm][APA] | $2.61 \pm 30.8$                | $-7.24 \pm 0.14$                     | 0.01                                  |
| [Ch][APA]   | $11.4 \pm 1.12$                | $-3.78 \pm 0.03$                     | 0.375                                 |



**Table S3. Summary and comparison of HNO release properties at physiological conditions (37 °C, pH = 7.4).**

| Materials                      | $t_{1/2}$ (min) <sup>a</sup>                | Ref.     |
|--------------------------------|---------------------------------------------|----------|
| [APMim][BF <sub>4</sub> ]      | 4.2                                         | -        |
| [P <sub>66614</sub> ][Tau]     | 325                                         | -        |
| [DBU][Tau]                     | 243                                         | -        |
| [EMIm][Tau]                    | 211                                         | -        |
| [EMIm][AMS]                    | 324                                         | -        |
| [EMIm][APS]                    | 959                                         | -        |
| [EMIm][APA]                    | 996                                         | -        |
| [Ch][APA]                      | 1061                                        | -        |
| Angeli's salt                  | 2.5                                         | (25, 27) |
| Piloty's acid                  | HNO only generated at ><br>physiological pH | (39)     |
| IsopropylamineNONOate (IPA/NO) | 2.3                                         | (26)     |
| Cyanamide (H <sub>2</sub> NCN) | -                                           | (25)     |
| Acyloxynitroso                 | -                                           | (40)     |

<sup>a</sup> HNO release half-life.

## REFERENCES AND NOTES

1. J. L. Shamshina, S. P. Kelley, G. Gurau, R. D. Rogers, Chemistry: Develop ionic liquid drugs. *Nature* **528**, 188–189 (2015).
2. C. Wang, X. Luo, H. Luo, D. Jiang, H. Li, S. Dai, Tuning the basicity of ionic liquids for equimolar CO<sub>2</sub> capture. *Angew. Chem. Int. Ed. Engl.* **50**, 4918–4922 (2011).
3. N. K. Vishwakarma, A. K. Singh, Y.-H. Hwang, D.-H. Ko, J.-O. Kim, A. G. Babu, D.-P. Kim, Integrated CO<sub>2</sub> capture-fixation chemistry via interfacial ionic liquid catalyst in laminar gas/liquid flow. *Nat. Commun.* **8**, 14676 (2017).
4. C. Wang, G. Cui, X. Luo, Y. Xu, H. Li, S. Dai, Highly efficient and reversible SO<sub>2</sub> capture by tunableazole-based ionic liquids through multiple-site chemical absorption. *J. Am. Chem. Soc.* **133**, 11916–11919 (2011).
5. D.-J. Tao, F.-F. Chen, Z.-Q. Tian, K. Huang, S. M. Mahurin, D. Jiang, S. Dai, Highly efficient carbon monoxide capture by carbanion-functionalized ionic liquids through C-site interactions. *Angew. Chem. Int. Edit.* **56**, 6843–6847 (2017).
6. K. Chen, G. Shi, X. Zhou, H. Li, C. Wang, Highly efficient nitric oxide capture byazole-based ionic liquids through multiple-site absorption. *Angew. Chem. Int. Edit.* **55**, 14362–14366 (2016).
7. D. M. Piper, T. Evans, K. Leung, T. Watkins, J. Olson, S. C. Kim, S. S. Han, V. Bhat, K. H. Oh, D. A. Buttry, S. H. Lee, Stable silicon-ionic liquid interface for next-generation lithium-ion batteries. *Nat. Commun.* **6**, 6230 (2015).
8. S. Bai, P. Da, C. Li, Z. Wang, Z. Yuan, F. Fu, M. Kawecki, X. Liu, N. Sakai, J. T.-W. Wang, S. Huettner, S. Buecheler, M. Fahlman, F. Gao, H. J. Snaith, Planar perovskite solar cells with long-term stability using ionic liquid additives. *Nature* **571**, 245–250 (2019).
9. B. A. Rosen, A. Salehi-Khojin, M. R. Thorson, W. Zhu, D. T. Whipple, P. J. A. Kenis, R. I. Masel, Ionic liquid-mediated selective conversion of CO<sub>2</sub> to CO at low overpotentials. *Science* **334**, 643–644 (2011)

10. Y. Ren, J. Guo, Z. Liu, Z. Sun, Y. Wu, L. Liu, F. Yang, Ionic liquid–based click-ionogels. *Sci. Adv.* **5**, eaax0648 (2019).
11. K. S. Egorova, E. G. Gordeev, V. P. Ananikov, Biological activity of ionic liquids and their application in pharmaceuticals and medicine. *Chem. Rev.* **117**, 7132–7189 (2017).
12. W. L. Hough, M. Smiglak, H. Rodríguez, R. P. Swatloski, S. K. Spear, D. T. Daly, J. Pernak, J. E. Grisel, R. D. Carliss, M. D. Soutullo, J. H. Davis Jr, R. D. Rogers, The third evolution of ionic liquids: Active pharmaceutical ingredients. *New J. Chem.* **31**, 1429–1436 (2007).
13. I. C. B. Martins, M. C. Oliveira, H. P. Diogo, L. C. Branco, M. T. Duarte, Mechano API-ILs: Pharmaceutical ionic liquids obtained through mechanochemical synthesis. *ChemSusChem* **10**, 1360–1363 (2017).
14. H. Wang, G. Gurau, J. Shamshina, O. A. Cojocaru, J. Janikowski, D. R. MacFarlane, J. H. Davis Jr, R. D. Rogers, Simultaneous membrane transport of two active pharmaceutical ingredients by charge assisted hydrogen bond complex formation. *Chem. Sci.* **5**, 3449–3456 (2014).
15. O. Zavgorodnya, J. L. Shamshina, M. Mittenthal, P. D. McCrary, G. P. Rachiero, H. M. Titi, R. D. Rogers, Polyethylene glycol derivatization of the non-active ion in active pharmaceutical ingredient ionic liquids enhances transdermal delivery. *New J. Chem.* **41**, 1499–1508 (2017).
16. Y. Miwa, H. Hamamoto, T. Ishida, Lidocaine self-sacrificially improves the skin permeation of the acidic and poorly water-soluble drug etodolac via its transformation into an ionic liquid. *Eur. J. Pharm. Biopharm.* **102**, 92–100 (2016).
17. L. J. Ignarro, Nitric oxide: A unique endogenous signaling molecule in vascular biology (Nobel lecture). *Angew. Chem. Int. Ed.* **38**, 1882–1892 (1999).
18. E. Culotta, D. E. Koshland Jr, No news is good news. *Science* **258**, 1862–1865 (1992)
19. A. W. Carpenter, M. H. Schoenfisch, Nitric oxide release: Part II. Therapeutic applications. *Chem. Soc. Rev.* **41**, 3742–3752 (2012).

20. R. F. Furchgott, Endothelium-derived relaxing factor: Discovery, early studies, and identification as nitric oxide (Nobel lecture). *Angew. Chem. Int. Ed.* **38**, 1870–1880 (1999).
21. F. Murad, Discovery of some of the biological effects of nitric oxide and its role in cell signaling (Nobel lecture). *Angew. Chem. Int. Ed.* **38**, 1857–1868 (1999).
22. P. Pagliaro, D. Mancardi, R. Rastaldo, C. Penna, D. Gattullo, K. M. Miranda, M. Feelisch, D. A. Wink, D. A. Kass, N. Paolocci, Nitroxyl affords thiol-sensitive myocardial protective effects akin to early preconditioning. *Free Radical Biol. Med.* **34**, 33–43 (2003).
23. L. K. Keefer, Fifty years of diazeniumdiolate research. From laboratory curiosity to broad-spectrum biomedical advances. *ACS Chem. Biol.* **6**, 1147–1155 (2011).
24. N. Paolocci, M. I. Jackson, B. E. Lopez, K. Miranda, C. G. Tocchetti, D. A. Wink, A. J. Hobbs, J. M. Fukuto, The pharmacology of nitroxyl (HNO) and its therapeutic potential: Not just the Janus face of NO. *Pharmacol. Ther.* **113**, 442–458 (2007).
25. K. M. Miranda, H. T. Nagasawa, J. P. Toscano, Donors of HNO. *Curr. Top. Med. Chem.* **5**, 649–664 (2005).
26. K. M. Miranda, T. Katori, C. L. T. de Holding, L. Thomas, L. A. Ridnour, W. J. McLendon, S. M. Cologna, A. S. Dutton, H. C. Champion, D. Mancardi, C. G. Tocchetti, J. E. Saavedra, L. K. Keefer, K. N. Houk, J. M. Fukuto, D. A. Kass, N. Paolocci, D. A. Wink, Comparison of the NO and HNO donating properties of diazeniumdiolates: Primary amine adducts release HNO in vivo. *J. Med. Chem.* **48**, 8220–8228 (2005).
27. A. S. Dutton, J. M. Fukuto, K. N. Houk, Mechanisms of HNO and NO production from Angeli's salt: Density functional and CBS-QB3 theory predictions. *J. Am. Chem. Soc.* **126**, 3795–3800 (2004).
28. D. J. Salmon, C. L. T. de Holding, L. Thomas, K. V. Peterson, G. P. Goodman, J. E. Saavedra, A. Srinivasan, K. M. Davies, L. K. Keefer, K. M. Miranda, HNO and NO release from a primary amine-based diazeniumdiolate as a function of pH. *Inorg. Chem.* **50**, 3262–3270 (2011).

29. C. M. Maragos, D. Morley, D. A. Wink, T. M. Dunams, J. E. Saavedra, A. Hoffman, A. A. Bove, L. Isaac, J. A. Hrabie, L. K. Keefer, Complexes of NO with nucleophiles as agents for the controlled biological release of nitric-oxide. vasorelaxant effects. *J. Med. Chem.* **34**, 3242–3247 (1991).
30. S. Schaffer, H. W. Kim, Effects and mechanisms of taurine as a therapeutic agent. *Biomol. Ther.* **26**, 225–241 (2018).
31. R. S. Drago, B. R. Karstetter, The reaction of nitrogen(II) oxide with various primary and secondary amines. *J. Am. Chem. Soc.* **83**, 1819–1822 (1961).
32. R. S. Drago, F. E. Paulik, The reaction of nitrogen (II) oxide with diethylamine. *J. Am. Chem. Soc.* **82**, 96–98 (1960).
33. Z. J. Huang, J. Kaur, A. Bhardwaj, N. Alsaleh, J. A. Reisz, J. F. DuMond, S. B. King, J. M. Seubert, Y. H. Zhang, E. E. Knaus, O<sup>2</sup>-sulfonylethyl protected isopropylamine diazen-1-ium-1,2-diolates as nitroxyl (HNO) donors: Synthesis,  $\beta$ -elimination fragmentation, HNO release, positive inotropic properties, and blood pressure lowering studies. *J. Med. Chem.* **55**, 10262–10271 (2012).
34. E. Espinosa, E. Molins, C. Lecomte, Hydrogen bond strengths revealed by topological analyses of experimentally observed electron densities. *Chem. Phys. Lett.* **285**, 170–173 (1998).
35. D. Fukumura, S. Kashiwagi, R. K. Jain, The role of nitric oxide in tumour progression. *Nat. Rev. Cancer* **6**, 521–534 (2006).
36. P. K. Lala, C. Chakraborty, Role of nitric oxide in carcinogenesis and tumour progression. *Lancet Oncol.* **2**, 149–156 (2001).
37. H. Fang, Z. Guo, L. Lin, J. Chen, P. Sun, J. Wu, C. Xu, H. Tian, X. Chen, Molecular strings significantly improved the gene transfection efficiency of polycations. *J. Am. Chem. Soc.* **140**, 11992–12000 (2018).
38. M. J. Frisch, G. W. Trucks, H. B. Schlegel, G. E. Scuseria, M. A. Robb, J. R. Cheeseman, G. Scalmani, V. Barone, B. Mennucci, G. A. Petersson, H. Nakatsuji, M. Caricato, X. Li, H. P. Hratchian, A. F. Izmaylov, J. Bloino, G. Zheng, J. L. Sonnenberg, M. Hada, M. Ehara, K. Toyota, R. Fukuda, J.

Hasegawa, M. Ishida, T. Nakajima, Y. Honda, O. Kitao, H. Nakai, T. Vreven, J. A. Montgomery, Jr., J. E. Peralta, F. Ogliaro, M. Bearpark, J. J. Heyd, E. Brothers, K. N. Kudin, V. N. Staroverov, R. Kobayashi, J. Normand, K. Raghavachari, A. Rendell, J. C. Burant, S. S. Iyengar, J. Tomasi, M. Cossi, N. Rega, J. M. Millam, M. Klene, J. E. Knox, J. B. Cross, V. Bakken, C. Adamo, J. Jaramillo, R. Gomperts, R. E. Stratmann, O. Yazyev, A. J. Austin, R. Cammi, C. Pomelli, J. W. Ochterski, R. L. Martin, K. Morokuma, V. G. Zakrzewski, G. A. Voth, P. Salvador, J. J. Dannenberg, S. Dapprich, A. D. Daniels, O. Farkas, J. B. Foresman, J. V. Ortiz, J. Cioslowski, D. J. Fox, *Gaussian 09, Revision D.01* (Gaussian, Inc., 2009).

39. F. T. Bonner, Y. Ko, Kinetic, isotopic, and nitrogen-15 NMR study of N-hydroxybenzenesulfonamide decomposition: An nitrosyl hydride (HNO) source reaction. *Inorg. Chem.* **31**, 2514–2519 (1992).
40. X. Sha, T. S. Isbell, R. P. Patel, C. S. Day, S. B. King, Hydrolysis of acyloxy nitroso compounds yields nitroxyl (HNO). *J. Am. Chem. Soc.* **128**, 9687–9692 (2006).
